# Supplementary material
Source: publisher figshare collection journal article supplement (https://karger.figshare.com/ndownloader/files/32886746)
Supplement: Supplementary file 1 [file 32886746]

**Supplemental Table 1**. FISH probe names and detectable cytogenetic abnormalities.

| **Probe names** | **Cytogenetic abnormalities** |
| --- | --- |
| Vysis LSI IgH/FGFR3 DC, DF Translocation Probe | IgH/FGFR3 |
| Vysis LSI IgH/MAF DC, DF Probe | IgH/MAF |
| Vysis LSI TP53 SO/CEP17 SG Probe | del(17p) |
| Vysis LSI IgH/CCND1 DC, DF Translocation Probe | IgH/CCND1 |
| Vysis LSI IgH/MYC, CEP-8 Tri-Color Dual Fusion Probe | IgH/MYC and Additional chromosome 8 |
